# Supplementary material for: Lamellae-controlled electrical properties of polyethylene – morphology, oxidation and effects of antioxidant on the DC conductivity
Source: Royal Society of Chemistry journal article supplement (doi:10.1039/c9ra09479b), 2020-01-01
Supplement: c9ra09479b1.pdf [file c9ra09479b1.pdf]

## Supporting information

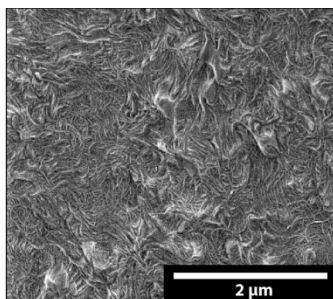

Fig. S1. Micrograph of the bulk morphology for LDPE + 0.02 wt % antioxidant extruded 6 min prior compression moulding to a film.

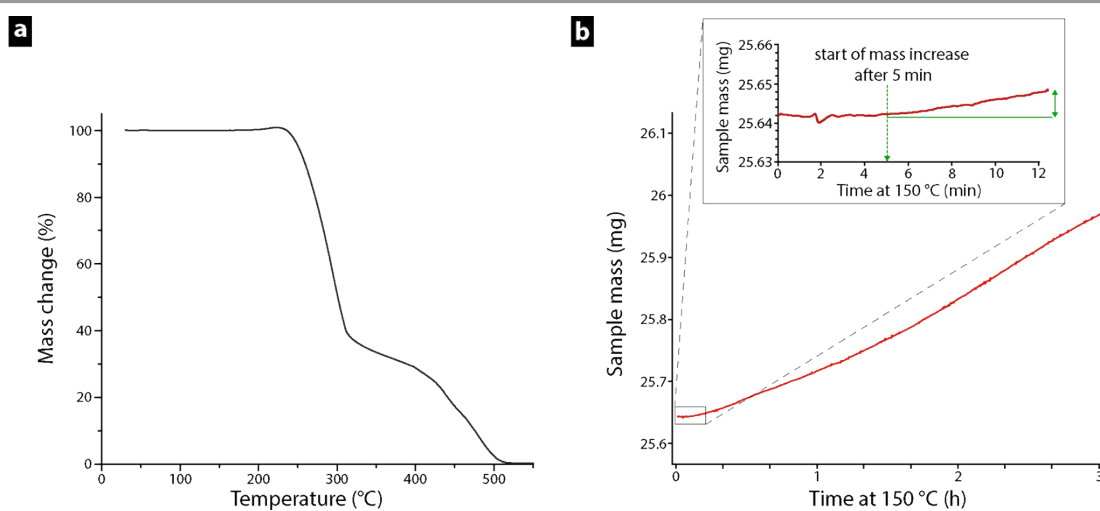

Fig. S2. Thermogravimetric measurements of LDPE without added antioxidants in an oxygen atmosphere with a temperature increase of  $10\text{ °C min}^{-1}$  (a) and isothermal at  $150\text{ °C}$  (b).

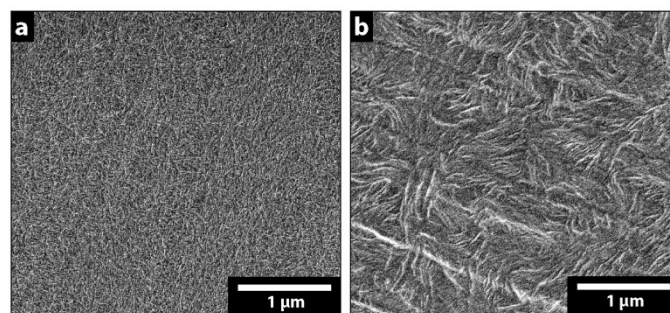

Fig. S3. Surface morphology of pressed thin film samples for using PET (a) and Al foil (b) as protective pressing films, respectively.
